# Supplementary material for: Pan-tumor survey of ROS1 fusions detected by next-generation RNA and whole transcriptome sequencing
Source: PubMed Central journal article supplement (PMC10585918; doi:10.1186/s12885-023-11457-2), 2023-10-18
Supplement: 12885_2023_11457_MOESM1_ESM.pdf [file 12885_2023_11457_MOESM1_ESM.pdf]

Supplementary Figure 1. Supplementary Figure 1. TPS score and TMB in ROS1+ NSCLC cohort

## TPS score in the ROS1+ NSCLC cohort

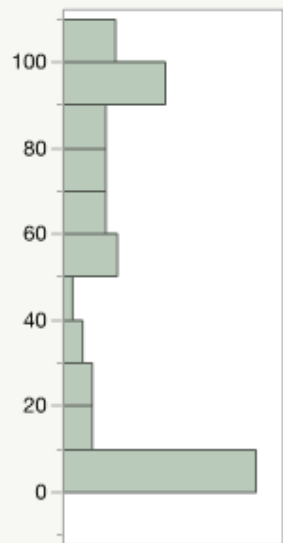

### Quantiles

| Percentile | Label    | Value |
|------------|----------|-------|
| 100.0%     | maximum  | 100   |
| 99.5%      |          | 100   |
| 97.5%      |          | 100   |
| 90.0%      |          | 95    |
| 75.0%      | quartile | 90    |
| 50.0%      | median   | 50    |
| 25.0%      | quartile | 2     |
| 10.0%      |          | 0     |
| 2.5%       |          | 0     |
| 0.5%       |          | 0     |
| 0.0%       | minimum  | 0     |

### Summary Statistics

|                |           |
|----------------|-----------|
| Mean           | 46.036649 |
| Std Dev        | 38.354904 |
| Std Err Mean   | 2.7752634 |
| Upper 95% Mean | 51.510935 |
| Lower 95% Mean | 40.562364 |
| N              | 191       |

| Test             | Positive | Negative | Total | %     |
|------------------|----------|----------|-------|-------|
| IHC-PD-L1 (22c3) | 155      | 36       | 191   | 81.2% |

## TMB in the ROS1+ NSCLC cohort

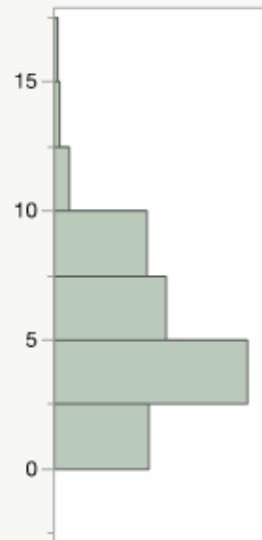

### Quantiles

| Percentile | Label    | Value |
|------------|----------|-------|
| 100.0%     | maximum  | 15    |
| 99.5%      |          | 15    |
| 97.5%      |          | 12    |
| 90.0%      |          | 8     |
| 75.0%      | quartile | 7     |
| 50.0%      | median   | 4     |
| 25.0%      | quartile | 3     |
| 10.0%      |          | 2     |
| 2.5%       |          | 1     |
| 0.5%       |          | 0     |
| 0.0%       | minimum  | 0     |

### Summary Statistics

|                |           |
|----------------|-----------|
| Mean           | 4.8563218 |
| Std Dev        | 2.8481898 |
| Std Err Mean   | 0.2159207 |
| Upper 95% Mean | 5.2825    |
| Lower 95% Mean | 4.4301437 |
| N              | 174       |

| Test     | Positive | Negative | Total | %    |
|----------|----------|----------|-------|------|
| NGS -TMB | 8        | 166      | 174   | 4.6% |
